# Supplementary material
Source: Springer Nature journal article supplement (https://www.springermedizin.de/resource/supplementary/13041_2013_215_MOESM5_ESM.pdf/25657760)

A

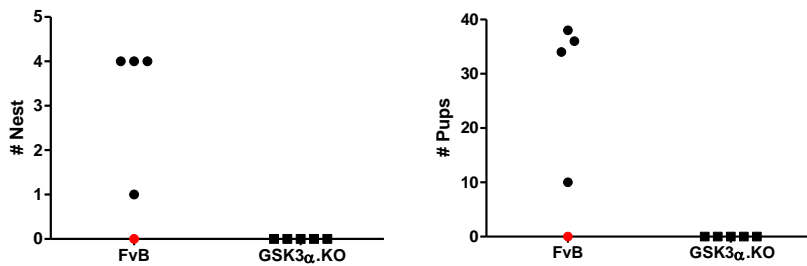

B

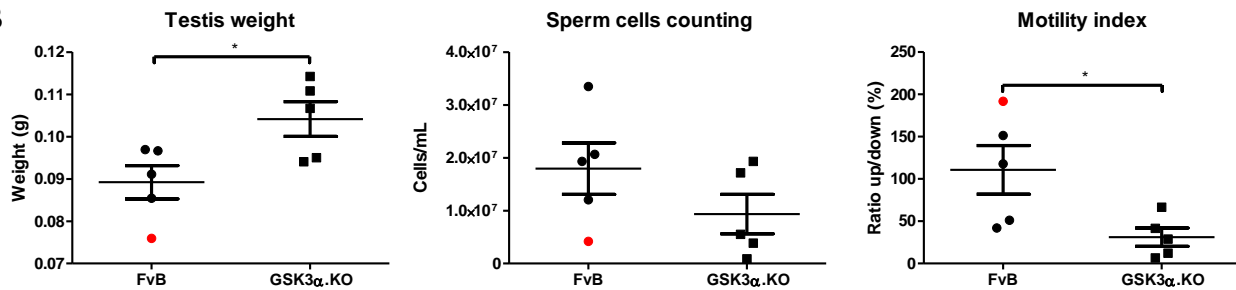

C

FvB

GSK3 $\alpha$ .KO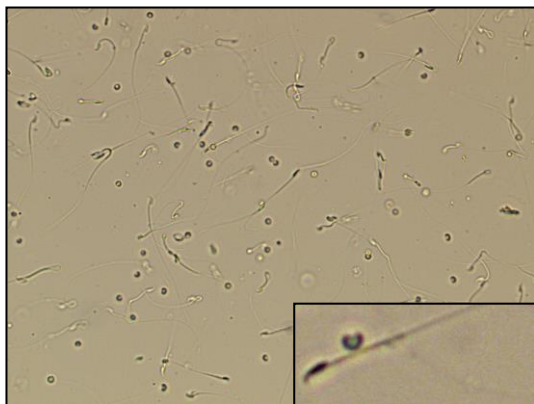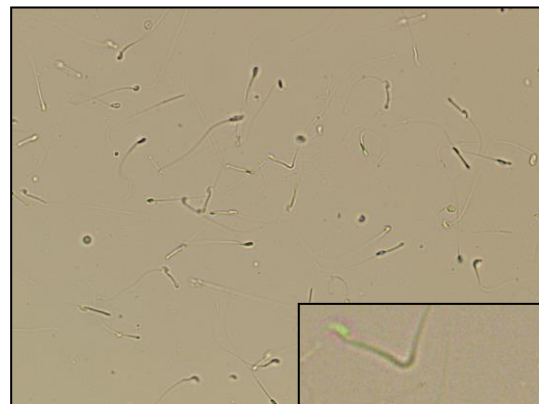

Supplement: MOESM5 [file 25657760]
